# Supplementary material for: Does human foot anthropometry relate to plantar flexor fascicle mechanics and metabolic energy cost across various walking speeds?
Source: Oxford University Press journal article supplement (doi:10.1242/jeb.245113), 2023-04-24
Supplement: jeb245113supp.pdf [file jeb245113supp.pdf]

**Table S1. Means, standard deviation (SD), and Pearson correlation matrix for anthropometric variables (N=15).**

|             | Mean±SD     | Heel (cm) | Hallux (cm) | Height (cm) | Mass (kg) |
|-------------|-------------|-----------|-------------|-------------|-----------|
| Heel (cm)   | 4.07±0.63   | 1.00      |             |             |           |
| Hallux (cm) | 6.34±0.67   | 0.45      | 1.00        |             |           |
| Height (cm) | 176±7.3     | 0.42      | 0.40        | 1.00        |           |
| Mass (kg)   | 76.43±12.43 | -0.06     | 0.31        | 0.35        | 1.00      |

\*. Correlation is significant at the 0.05 level (2-tailed).

**Table S2. Regressions between normalized foot anthropometric measurements (% height) and dependent variables (N=15).**

Definitions:

- **Heel:** The horizontal distance between the lateral malleolus and the most posterior point of the Achilles tendon.
- **Hallux:** The horizontal distance from the first metatarsal head to the most anterior aspect of the toe.
- **Heel<sub>Average</sub>:** The average of 1) horizontal distance between the lateral malleolus and posterior point of the Achilles tendon and 2) horizontal distance between the medial malleolus and the most posterior point of the Achilles tendon.
- **Mid-foot:** The horizontal distance between the medial malleolus and the first metatarsal head.

**A** Soleus average shortening velocity (mms<sup>-1</sup>)

| Speed                   | 1.25 ms <sup>-1</sup> |        |         | 1.75 ms <sup>-1</sup> |        |         | 2.00 ms <sup>-1</sup> |       |         |
|-------------------------|-----------------------|--------|---------|-----------------------|--------|---------|-----------------------|-------|---------|
|                         | R <sup>2</sup>        | Slope  | P-value | R <sup>2</sup>        | Slope  | P-value | R <sup>2</sup>        | Slope | P-value |
| Heel                    | 0.003                 | 0.398  | 0.846   | <0.001                | -0.086 | 0.961   | 0.001                 | 0.209 | 0.925   |
| Hallux                  | <0.001                | -0.117 | 0.952   | 0.010                 | -0.570 | 0.728   | <0.001                | 0.135 | 0.948   |
| Heel <sub>Average</sub> | 0.017                 | 1.561  | 0.642   | 0.084                 | 2.936  | 0.294   | <0.001                | 0.174 | 0.962   |
| Mid-foot                | 0.037                 | -0.817 | 0.492   | 0.011                 | 0.382  | 0.707   | 0.005                 | 0.335 | 0.795   |

\*. Correlation is significant at the 0.05 level (2-tailed).

**B** Soleus shortening velocity at peak/maximum ankle plantar flexion moment (mms<sup>-1</sup>)

| Speed                   | 1.25 ms <sup>-1</sup> |        |         | 1.75 ms <sup>-1</sup> |        |         | 2.00 ms <sup>-1</sup> |        |         |
|-------------------------|-----------------------|--------|---------|-----------------------|--------|---------|-----------------------|--------|---------|
|                         | R <sup>2</sup>        | Slope  | P-value | R <sup>2</sup>        | Slope  | P-value | R <sup>2</sup>        | Slope  | P-value |
| Heel                    | 0.132                 | 14.273 | 0.183   | 0.320                 | 20.493 | 0.028*† | 0.003                 | 1.193  | 0.858   |
| Hallux                  | 0.060                 | -9.094 | 0.377   | 0.033                 | 6.228  | 0.515   | 0.090                 | -6.710 | 0.276   |
| Heel <sub>Average</sub> | 0.080                 | 18.198 | 0.308   | 0.271                 | 30.682 | 0.046*  | <0.001                | -0.442 | 0.968   |
| Mid-foot                | 0.096                 | 7.104  | 0.261   | 0.095                 | 6.508  | 0.265   | 0.015                 | 1.703  | 0.662   |

\*. Correlation is significant at the 0.05 level (2-tailed).

†. Cook's distance values indicated a possible significant outlier. We removed the outlier, and we rerun the analysis (N=14). The output was: R<sup>2</sup> = 0.153, Slope = 9.831 and P-value = 0.166.

**C** Peak/maximum ankle plantar flexion (Nmkg<sup>-1</sup>)

| Speed                   | 1.25 ms <sup>-1</sup> |        |         | 1.75 ms <sup>-1</sup> |        |         | 2.00 ms <sup>-1</sup> |        |         |
|-------------------------|-----------------------|--------|---------|-----------------------|--------|---------|-----------------------|--------|---------|
|                         | R <sup>2</sup>        | Slope  | P-value | R <sup>2</sup>        | Slope  | P-value | R <sup>2</sup>        | Slope  | P-value |
| Heel                    | 0.107                 | 0.136  | 0.234   | 0.044                 | 0.106  | 0.454   | 0.056                 | 0.138  | 0.397   |
| Hallux                  | 0.131                 | 0.142  | 0.185   | 0.080                 | 0.135  | 0.307   | 0.115                 | 0.186  | 0.217   |
| Heel <sub>Average</sub> | 0.001                 | 0.019  | 0.923   | 0.015                 | -0.102 | 0.664   | 0.001                 | -0.033 | 0.902   |
| Mid-foot                | 0.204                 | -0.109 | 0.091   | 0.091                 | -0.089 | 0.274   | 0.095                 | -0.105 | 0.263   |

\*. Correlation is significant at the 0.05 level (2-tailed).

**D** Cost of transport (Jkg<sup>-1</sup>m<sup>-1</sup>)

| Speed                   | 1.25 ms <sup>-1</sup> |        |         | 1.75 ms <sup>-1</sup> |        |         | 2.00 ms <sup>-1</sup> |        |         |
|-------------------------|-----------------------|--------|---------|-----------------------|--------|---------|-----------------------|--------|---------|
|                         | R <sup>2</sup>        | Slope  | P-value | R <sup>2</sup>        | Slope  | P-value | R <sup>2</sup>        | Slope  | P-value |
| Heel                    | 0.012                 | -0.081 | 0.701   | 0.171                 | -0.357 | 0.126   | 0.305                 | -0.980 | 0.033*  |
| Hallux                  | 0.038                 | 0.138  | 0.487   | 0.005                 | -0.059 | 0.798   | 0.048                 | -0.367 | 0.432   |
| Heel <sub>Average</sub> | <0.001                | -0.027 | 0.939   | 0.063                 | -0.355 | 0.368   | 0.073                 | -0.785 | 0.330   |
| Mid-foot                | 0.173                 | 0.182  | 0.123   | 0.292                 | 0.273  | 0.037*  | 0.240                 | 0.507  | 0.064   |

\*. Correlation is significant at the 0.05 level (2-tailed).

**E** Ground reaction moment arm at peak/maximum ankle plantar flexion (cm)

| Speed                   | 1.25 ms <sup>-1</sup> |        |         | 1.75 ms <sup>-1</sup> |        |         | 2.00 ms <sup>-1</sup> |        |         |
|-------------------------|-----------------------|--------|---------|-----------------------|--------|---------|-----------------------|--------|---------|
|                         | R <sup>2</sup>        | Slope  | P-value | R <sup>2</sup>        | Slope  | P-value | R <sup>2</sup>        | Slope  | P-value |
| Heel                    | 0.117                 | -0.010 | 0.212   | 0.113                 | -0.010 | 0.220   | 0.198                 | -0.012 | 0.096   |
| Hallux                  | 0.093                 | -0.009 | 0.269   | 0.096                 | -0.009 | 0.261   | 0.193                 | -0.012 | 0.102   |
| Heel <sub>Average</sub> | 0.025                 | -0.008 | 0.575   | 0.033                 | -0.009 | 0.515   | 0.117                 | -0.016 | 0.212   |
| Mid-foot                | 0.475                 | 0.012  | 0.005*  | 0.510                 | 0.013  | 0.003*  | 0.510                 | 0.012  | 0.003*  |

\*. Correlation is significant at the 0.05 level (2-tailed).

**Table S3. Regressions between unnormalized foot anthropometric measurements (cm) and dependent variables (N=15).**

Definitions:

- **Heel:** The horizontal distance between the lateral malleolus and the most posterior point of the Achilles tendon.
- **Hallux:** The horizontal distance from the first metatarsal head to the most anterior aspect of the toe.
- **Heel<sub>Average</sub>:** The average of 1) horizontal distance between the lateral malleolus and posterior point of the Achilles tendon and 2) horizontal distance between the medial malleolus and the most posterior point of the Achilles tendon.
- **Mid-foot:** The horizontal distance between the medial malleolus and the first metatarsal head.
- **Hallux/Heel:** Ratio of hallux length over lateral heel length.
- **Mid-foot/Heel:** Ratio of mid-foot length over lateral heel length.

**A** Soleus average shortening velocity (mms<sup>-1</sup>)

| Speed                   | 1.25 ms <sup>-1</sup> |        |         | 1.75 ms <sup>-1</sup> |        |                    | 2.00 ms <sup>-1</sup> |        |         |
|-------------------------|-----------------------|--------|---------|-----------------------|--------|--------------------|-----------------------|--------|---------|
|                         | R <sup>2</sup>        | Slope  | P-value | R <sup>2</sup>        | Slope  | P-value            | R <sup>2</sup>        | Slope  | P-value |
| Heel                    | 0.003                 | 0.212  | 0.844   | 0.011                 | -0.336 | 0.713              | <0.001                | -0.056 | 0.962   |
| Hallux                  | <0.001                | -0.010 | 0.992   | 0.049                 | -0.678 | 0.430 <sup>†</sup> | <0.001                | -0.077 | 0.944   |
| Heel <sub>Average</sub> | 0.018                 | 0.811  | 0.633   | 0.010                 | 0.519  | 0.719              | 0.002                 | -0.309 | 0.867   |
| Mid-foot                | <0.001                | -0.010 | 0.991   | 0.166                 | -1.131 | 0.131              | 0.049                 | -0.781 | 0.427   |
| Hallux/Heel             | 0.003                 | -0.652 | 0.836   | 0.006                 | -0.729 | 0.786              | 0.001                 | -0.428 | 0.900   |
| Mid-foot/Heel           | 0.002                 | -0.216 | 0.879   | 0.013                 | -0.481 | 0.689              | 0.020                 | -0.770 | 0.613   |

\*. Correlation is significant at the 0.05 level (2-tailed).

†. Cook's distance values indicated a possible significant outlier. We removed the outlier, and we reran the analysis (N=14). The output was: R<sup>2</sup> = 0.305, Slope = -1.967 and P-value = 0.041.

**B** Soleus shortening velocity at peak/maximum ankle plantar flexion moment (mms<sup>-1</sup>)

| Speed                   | 1.25 ms <sup>-1</sup> |         |         | 1.75 ms <sup>-1</sup> |         |                    | 2.00 ms <sup>-1</sup> |         |         |
|-------------------------|-----------------------|---------|---------|-----------------------|---------|--------------------|-----------------------|---------|---------|
|                         | R <sup>2</sup>        | Slope   | P-value | R <sup>2</sup>        | Slope   | P-value            | R <sup>2</sup>        | Slope   | P-value |
| Heel                    | 0.127                 | 7.331   | 0.193   | 0.240                 | 9.306   | 0.064 <sup>†</sup> | <0.001                | 0.238   | 0.946   |
| Hallux                  | 0.039                 | -3.862  | 0.481   | 0.013                 | 2.079   | 0.683              | 0.100                 | -3.737  | 0.250   |
| Heel <sub>Average</sub> | 0.081                 | 9.262   | 0.305   | 0.160                 | 12.037  | 0.139              | 0.003                 | -1.127  | 0.839   |
| Mid-foot                | 0.027                 | -2.880  | 0.561   | 0.127                 | -5.808  | 0.192              | 0.246                 | -5.273  | 0.060   |
| Hallux/<br>Heel         | 0.388                 | -37.657 | 0.013*  | 0.287                 | -29.864 | 0.040*             | 0.101                 | -11.562 | 0.249   |
| Mid-foot/<br>Heel       | 0.220                 | -12.729 | 0.078   | 0.494                 | -17.594 | 0.003*             | 0.094                 | -5.023  | 0.266   |

\*. Correlation is significant at the 0.05 level (2-tailed).

†. Cook's distance values indicated a possible significant outlier. We removed the outlier, and we reran the analysis (N=14). The output: R<sup>2</sup> = 0.088, Slope = 3.842 and P-value = 0.302.

**C** Peak/maximum ankle plantar flexion (Nmkg<sup>-1</sup>)

| Speed                   | 1.25 ms <sup>-1</sup> |        |         | 1.75 ms <sup>-1</sup> |        |         | 2.00 ms <sup>-1</sup> |        |         |
|-------------------------|-----------------------|--------|---------|-----------------------|--------|---------|-----------------------|--------|---------|
|                         | R <sup>2</sup>        | Slope  | P-value | R <sup>2</sup>        | Slope  | P-value | R <sup>2</sup>        | Slope  | P-value |
| Heel                    | 0.220                 | 0.102  | 0.078   | 0.124                 | 0.094  | 0.198   | 0.135                 | 0.112  | 0.178   |
| Hallux                  | 0.346                 | 0.121  | 0.021*  | 0.249                 | 0.126  | 0.058   | 0.287                 | 0.156  | 0.039*  |
| Heel <sub>Average</sub> | 0.113                 | 0.116  | 0.220   | 0.035                 | 0.079  | 0.503   | 0.062                 | 0.120  | 0.372   |
| Mid-foot                | 0.439                 | 0.123  | 0.007*  | 0.517                 | 0.164  | 0.003*  | 0.569                 | 0.198  | 0.001*  |
| Hallux/<br>Heel         | 0.013                 | -0.074 | 0.682   | 0.001                 | -0.024 | 0.913   | <0.001                | -0.001 | 0.996   |
| Mid-foot/<br>Heel       | 0.068                 | -0.075 | 0.347   | 0.007                 | -0.030 | 0.759   | 0.003                 | -0.023 | 0.839   |

\*. Correlation is significant at the 0.05 level (2-tailed).

**D** Cost of transport ( $\text{Jkg}^{-1}\text{m}^{-1}$ )

| Speed                   | 1.25 $\text{ms}^{-1}$ |        |         | 1.75 $\text{ms}^{-1}$ |        |         | 2.00 $\text{ms}^{-1}$ |        |         |
|-------------------------|-----------------------|--------|---------|-----------------------|--------|---------|-----------------------|--------|---------|
|                         | R <sup>2</sup>        | Slope  | P-value | R <sup>2</sup>        | Slope  | P-value | R <sup>2</sup>        | Slope  | P-value |
| Heel                    | 0.020                 | -0.056 | 0.615   | 0.251                 | -0.227 | 0.057   | 0.440                 | -0.616 | 0.007*  |
| Hallux                  | 0.012                 | 0.040  | 0.702   | 0.064                 | -0.109 | 0.361   | 0.191                 | -0.386 | 0.103   |
| Heel <sub>Average</sub> | 0.010                 | -0.062 | 0.722   | 0.206                 | -0.326 | 0.089   | 0.285                 | -0.786 | 0.040*  |
| Mid-foot                | 0.072                 | -0.091 | 0.333   | 0.184                 | -0.167 | 0.110   | 0.359                 | -0.478 | 0.018*  |
| Hallux/<br>Heel         | 0.027                 | 0.190  | 0.558   | 0.131                 | 0.481  | 0.186   | 0.160                 | 1.091  | 0.140   |
| Mid-foot/<br>Heel       | <0.001                | -0.011 | 0.940   | 0.155                 | 0.235  | 0.146   | 0.229                 | 0.587  | 0.071   |

\*. Correlation is significant at the 0.05 level (2-tailed).

**E** Ground reaction moment arm at peak/maximum ankle plantar flexion (cm)

| Speed                   | 1.25 $\text{ms}^{-1}$ |        |         | 1.75 $\text{ms}^{-1}$ |        |         | 2.00 $\text{ms}^{-1}$ |        |         |
|-------------------------|-----------------------|--------|---------|-----------------------|--------|---------|-----------------------|--------|---------|
|                         | R <sup>2</sup>        | Slope  | P-value | R <sup>2</sup>        | Slope  | P-value | R <sup>2</sup>        | Slope  | P-value |
| Heel                    | 0.243                 | -0.008 | 0.062   | 0.234                 | -0.008 | 0.068   | 0.342                 | -0.009 | 0.022*  |
| Hallux                  | 0.303                 | -0.008 | 0.033*  | 0.300                 | -0.008 | 0.035*  | 0.448                 | -0.009 | 0.006*  |
| Heel <sub>Average</sub> | 0.224                 | -0.012 | 0.075   | 0.237                 | -0.012 | 0.066   | 0.400                 | -0.015 | 0.011*  |
| Mid-foot                | 0.506                 | -0.009 | 0.003*  | 0.519                 | -0.010 | 0.002*  | 0.525                 | -0.009 | 0.002*  |

\*. Correlation is significant at the 0.05 level (2-tailed).

**Table S4. Regressions between normalized foot anthropometric measurements (%height) and normalized stance-integrated electromyography (EMG) data (N=14).** The integrated EMG data for the 1.25 ms<sup>-1</sup> was used as the reference value, and thus no statistical analysis was applied (i.e., NaN).

**A** Lateral Gastrocnemius

| Speed  | 1.25 ms <sup>-1</sup> |       |         | 1.75 ms <sup>-1</sup> |        |         | 2.00 ms <sup>-1</sup> |        |         |
|--------|-----------------------|-------|---------|-----------------------|--------|---------|-----------------------|--------|---------|
|        | R <sup>2</sup>        | Slope | P-value | R <sup>2</sup>        | Slope  | P-value | R <sup>2</sup>        | Slope  | P-value |
| Heel   | NaN                   | NaN   | NaN     | 0.187                 | -0.299 | 0.122   | 0.205                 | -0.434 | 0.104   |
| Hallux | NaN                   | NaN   | NaN     | 0.014                 | -0.079 | 0.684   | 0.035                 | -0.171 | 0.523   |

\*. Correlation is significant at the 0.05 level (2-tailed).

**B** Medial Gastrocnemius

| Speed  | 1.25 ms <sup>-1</sup> |       |         | 1.75 ms <sup>-1</sup> |        |         | 2.00 ms <sup>-1</sup> |        |         |
|--------|-----------------------|-------|---------|-----------------------|--------|---------|-----------------------|--------|---------|
|        | R <sup>2</sup>        | Slope | P-value | R <sup>2</sup>        | Slope  | P-value | R <sup>2</sup>        | Slope  | P-value |
| Heel   | NaN                   | NaN   | NaN     | 0.676                 | -0.270 | <0.001* | 0.376                 | -0.331 | 0.020*  |
| Hallux | NaN                   | NaN   | NaN     | 0.144                 | -0.119 | 0.181   | 0.065                 | -0.132 | 0.378   |

\*. Correlation is significant at the 0.05 level (2-tailed).

**C** Soleus

| Speed  | 1.25 ms <sup>-1</sup> |       |         | 1.75 ms <sup>-1</sup> |        |         | 2.00 ms <sup>-1</sup> |        |         |
|--------|-----------------------|-------|---------|-----------------------|--------|---------|-----------------------|--------|---------|
|        | R <sup>2</sup>        | Slope | P-value | R <sup>2</sup>        | Slope  | P-value | R <sup>2</sup>        | Slope  | P-value |
| Heel   | NaN                   | NaN   | NaN     | 0.306                 | -0.203 | 0.040*  | 0.263                 | -0.249 | 0.061   |
| Hallux | NaN                   | NaN   | NaN     | 0.005                 | 0.024  | 0.819   | 0.074                 | 0.126  | 0.345   |

\*. Correlation is significant at the 0.05 level (2-tailed).

**D** Tibialis Anterior

| Speed  | 1.25 ms <sup>-1</sup> |       |         | 1.75 ms <sup>-1</sup> |        |         | 2.00 ms <sup>-1</sup> |        |         |
|--------|-----------------------|-------|---------|-----------------------|--------|---------|-----------------------|--------|---------|
|        | R <sup>2</sup>        | Slope | P-value | R <sup>2</sup>        | Slope  | P-value | R <sup>2</sup>        | Slope  | P-value |
| Heel   | NaN                   | NaN   | NaN     | 0.039                 | 0.110  | 0.498   | 0.038                 | 0.117  | 0.503   |
| Hallux | NaN                   | NaN   | NaN     | 0.010                 | -0.052 | 0.740   | <0.001                | -0.004 | 0.983   |

\*. Correlation is significant at the 0.05 level (2-tailed).



**Table S5. Regressions between unnormalized foot anthropometric measurements (cm) and normalized stance-integrated electromyography (EMG) data (N=14).** The integrated EMG data for the 1.25 ms<sup>-1</sup> was used as the reference value, and thus no statistical analysis was applied (i.e., NaN).

**A** Lateral Gastrocnemius

| Speed  | 1.25 ms <sup>-1</sup> |       |         | 1.75 ms <sup>-1</sup> |        |         | 2.00 ms <sup>-1</sup> |        |         |
|--------|-----------------------|-------|---------|-----------------------|--------|---------|-----------------------|--------|---------|
|        | R <sup>2</sup>        | Slope | P-value | R <sup>2</sup>        | Slope  | P-value | R <sup>2</sup>        | Slope  | P-value |
| Heel   | NaN                   | NaN   | NaN     | 0.153                 | -0.140 | 0.167   | 0.176                 | -0.208 | 0.135   |
| Hallux | NaN                   | NaN   | NaN     | 0.008                 | -0.031 | 0.757   | 0.028                 | -0.078 | 0.570   |

\*. Correlation is significant at the 0.05 level (2-tailed).

**B** Medial Gastrocnemius

| Speed  | 1.25 ms <sup>-1</sup> |       |         | 1.75 ms <sup>-1</sup> |        |         | 2.00 ms <sup>-1</sup> |        |         |
|--------|-----------------------|-------|---------|-----------------------|--------|---------|-----------------------|--------|---------|
|        | R <sup>2</sup>        | Slope | P-value | R <sup>2</sup>        | Slope  | P-value | R <sup>2</sup>        | Slope  | P-value |
| Heel   | NaN                   | NaN   | NaN     | 0.710                 | -0.143 | <0.001* | 0.422                 | -0.182 | 0.012*  |
| Hallux | NaN                   | NaN   | NaN     | 0.232                 | -0.078 | 0.081   | 0.134                 | -0.097 | 0.198   |

\*. Correlation is significant at the 0.05 level (2-tailed).

**C** Soleus

| Speed  | 1.25 ms <sup>-1</sup> |       |         | 1.75 ms <sup>-1</sup> |        |         | 2.00 ms <sup>-1</sup> |        |         |
|--------|-----------------------|-------|---------|-----------------------|--------|---------|-----------------------|--------|---------|
|        | R <sup>2</sup>        | Slope | P-value | R <sup>2</sup>        | Slope  | P-value | R <sup>2</sup>        | Slope  | P-value |
| Heel   | NaN                   | NaN   | NaN     | 0.323                 | -0.108 | 0.034*  | 0.298                 | -0.138 | 0.043*  |
| Hallux | NaN                   | NaN   | NaN     | 0.001                 | -0.006 | 0.911   | 0.017                 | 0.031  | 0.655   |

\*. Correlation is significant at the 0.05 level (2-tailed).

**D** Tibialis Anterior

| Speed  | 1.25 ms <sup>-1</sup> |       |         | 1.75 ms <sup>-1</sup> |        |         | 2.00 ms <sup>-1</sup> |        |         |
|--------|-----------------------|-------|---------|-----------------------|--------|---------|-----------------------|--------|---------|
|        | R <sup>2</sup>        | Slope | P-value | R <sup>2</sup>        | Slope  | P-value | R <sup>2</sup>        | Slope  | P-value |
| Heel   | NaN                   | NaN   | NaN     | 0.010                 | 0.028  | 0.738   | 0.025                 | 0.050  | 0.587   |
| Hallux | NaN                   | NaN   | NaN     | 0.047                 | -0.059 | 0.459   | 0.001                 | -0.010 | 0.912   |

\*. Correlation is significant at the 0.05 level (2-tailed).
